# Supplementary material for: Cytomegalovirus Specific Serological and Molecular Markers in a Series of Pregnant Women with Cytomegalovirus Non Primary Infection
Source: MDPI journal article supplement (doi:10.3390/v14112425), 2022-10-31
Supplement: s1 [file s1]

**Figure S1: Number of serums according to term of pregnancy.**

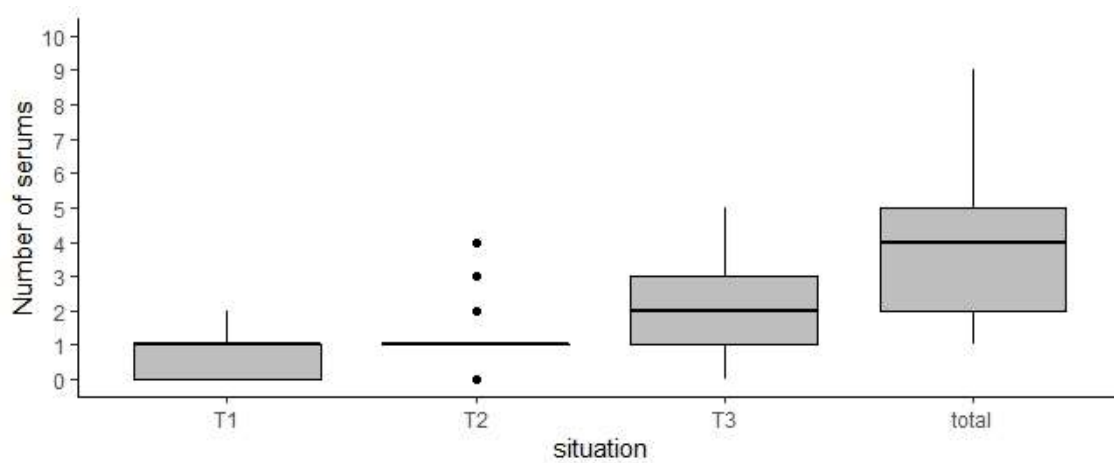

The boxplot shows the number of serum samples per patient, according to the term of pregnancy: first, second, third trimester and total.

T1: first trimester; T2: second trimester; T3: third trimester
